# Supplementary material for: Blue-emitting and self-assembled thinner perovskite CsPbBr3 nanoplates: synthesis and formation mechanism
Source: Royal Society of Chemistry journal article supplement (doi:10.1039/c9nr10885h), 2020-01-01
Supplement: c9nr10885h1.pdf [file c9nr10885h1.pdf]

## Supporting Information

### Blue-emitting and self-assembled thinner perovskite CsPbBr<sub>3</sub> nanoplates: Synthesis and formation mechanism

Xiaolin Xiao, Ye Li\*, Rong-Jun Xie\*

College of Materials, Xiamen University, No. 422, Simingnan Road, Xiamen 361005, China

Corresponding author: rjxie@xmu.edu.cn

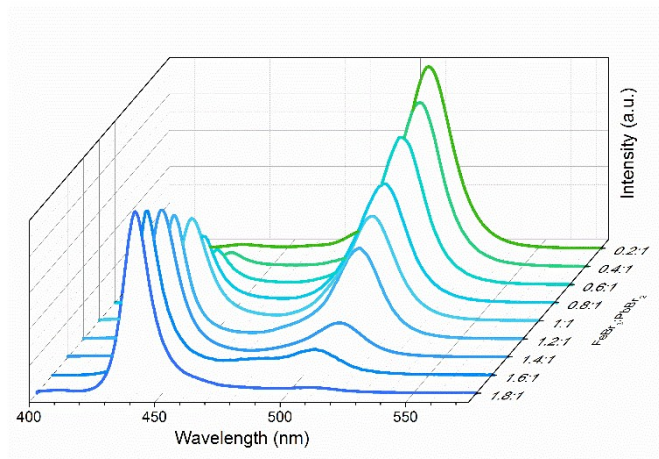

Figure S1. The UV-vis absorption, PL spectra of CsPbBr<sub>3</sub> nanocrystals synthesized with the [FeBr<sub>3</sub>:PbBr<sub>2</sub>] ratio from 0.2:1 to 1.8:1

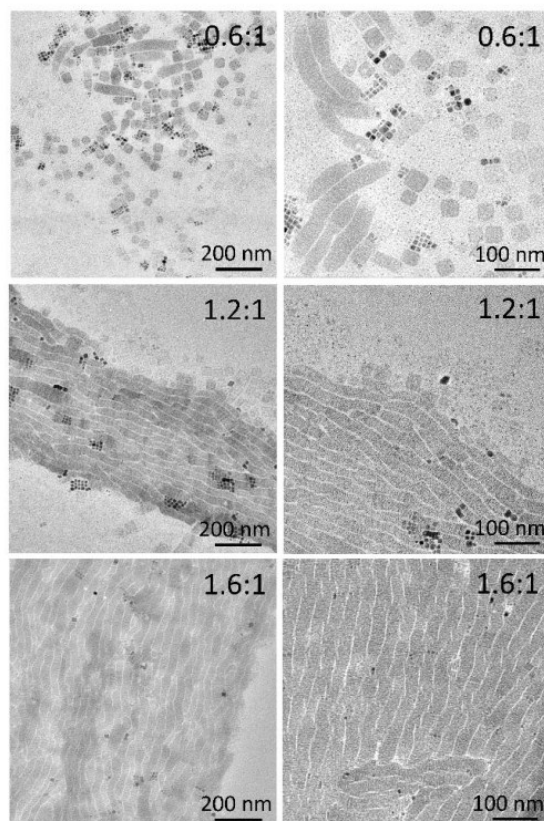

Figure S2. TEM images of CsPbBr<sub>3</sub> nanocrystals with [FeBr<sub>3</sub>:PbBr<sub>2</sub>] of 0.6:1, 1.2:1 and 1.6:1

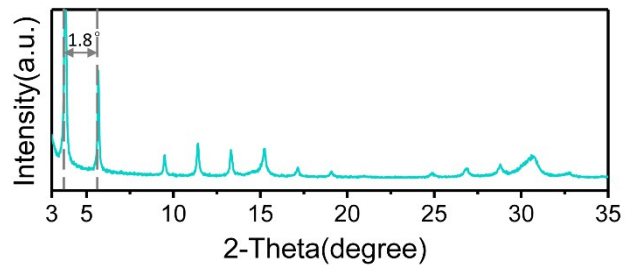

Figure S3. Small-angle XRD spectra of CsPbBr<sub>3</sub> nanocrystals (FeBr<sub>3</sub>:PbBr<sub>2</sub>=0.8:1)

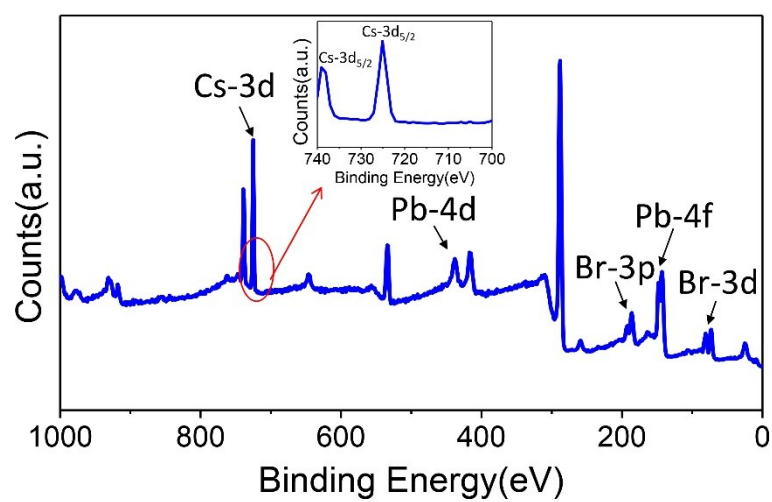

Figure S5. XPS spectra of NPLs and the detail in Cs 3d section

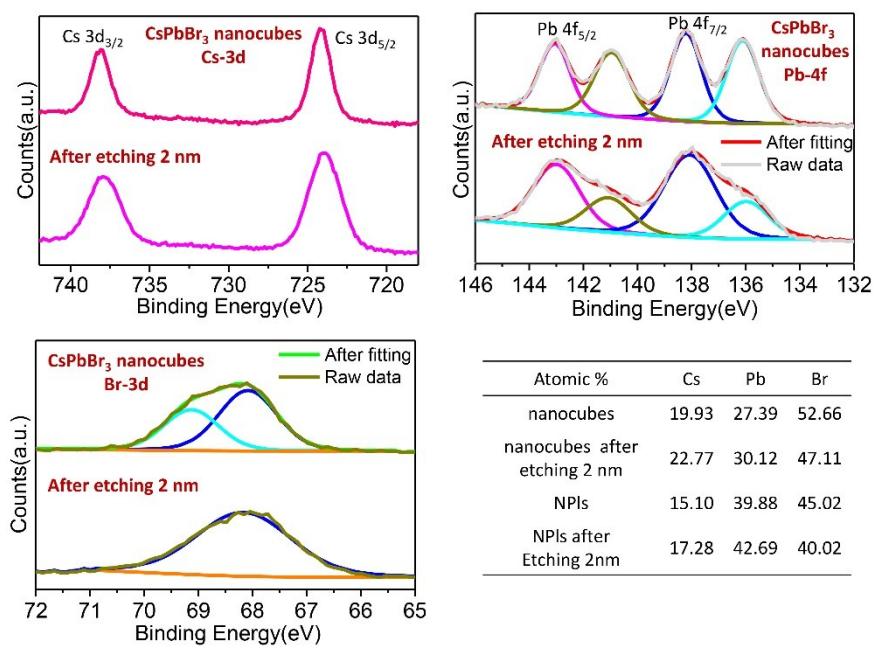

Figure S6. XPS spectra of CsPbBr<sub>3</sub> nanocubes before and after etching 2 nm and specific atomic percentage of nanocubes and NPIs.

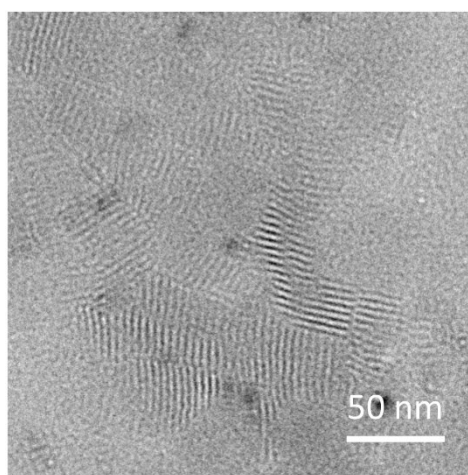

Figure S7. TEM image of CsPbBr<sub>3</sub> nanocubes and NPIs by introducing 0.6 mL OLA-HBr

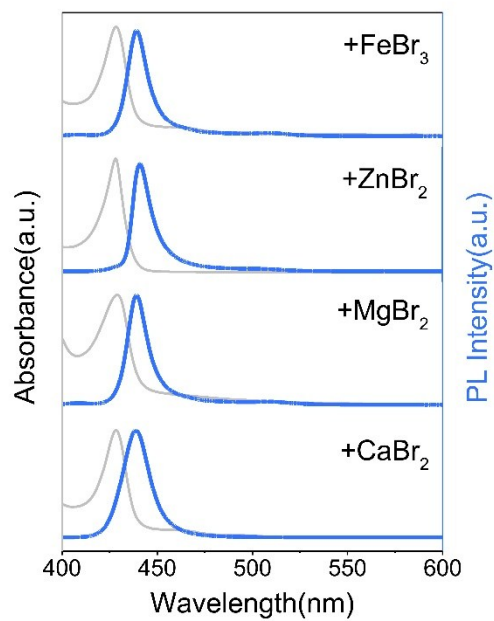

Figure S8. UV-vis absorption, PL spectra of CsPbBr<sub>3</sub> NPIs synthesized with different types of metal bromides

Table S1. Absorption and PL peak of CsPbBr<sub>3</sub> NPIs synthesized with different types of metal bromides

|                          | Additional metal halide | PL peak (nm) |
|--------------------------|-------------------------|--------------|
| CsPbBr <sub>3</sub> NPIs | FeBr <sub>3</sub>       | 437          |
|                          | ZnBr <sub>2</sub>       | 440          |
|                          | MgBr <sub>2</sub>       | 437          |
|                          | CaBr <sub>2</sub>       | 438          |

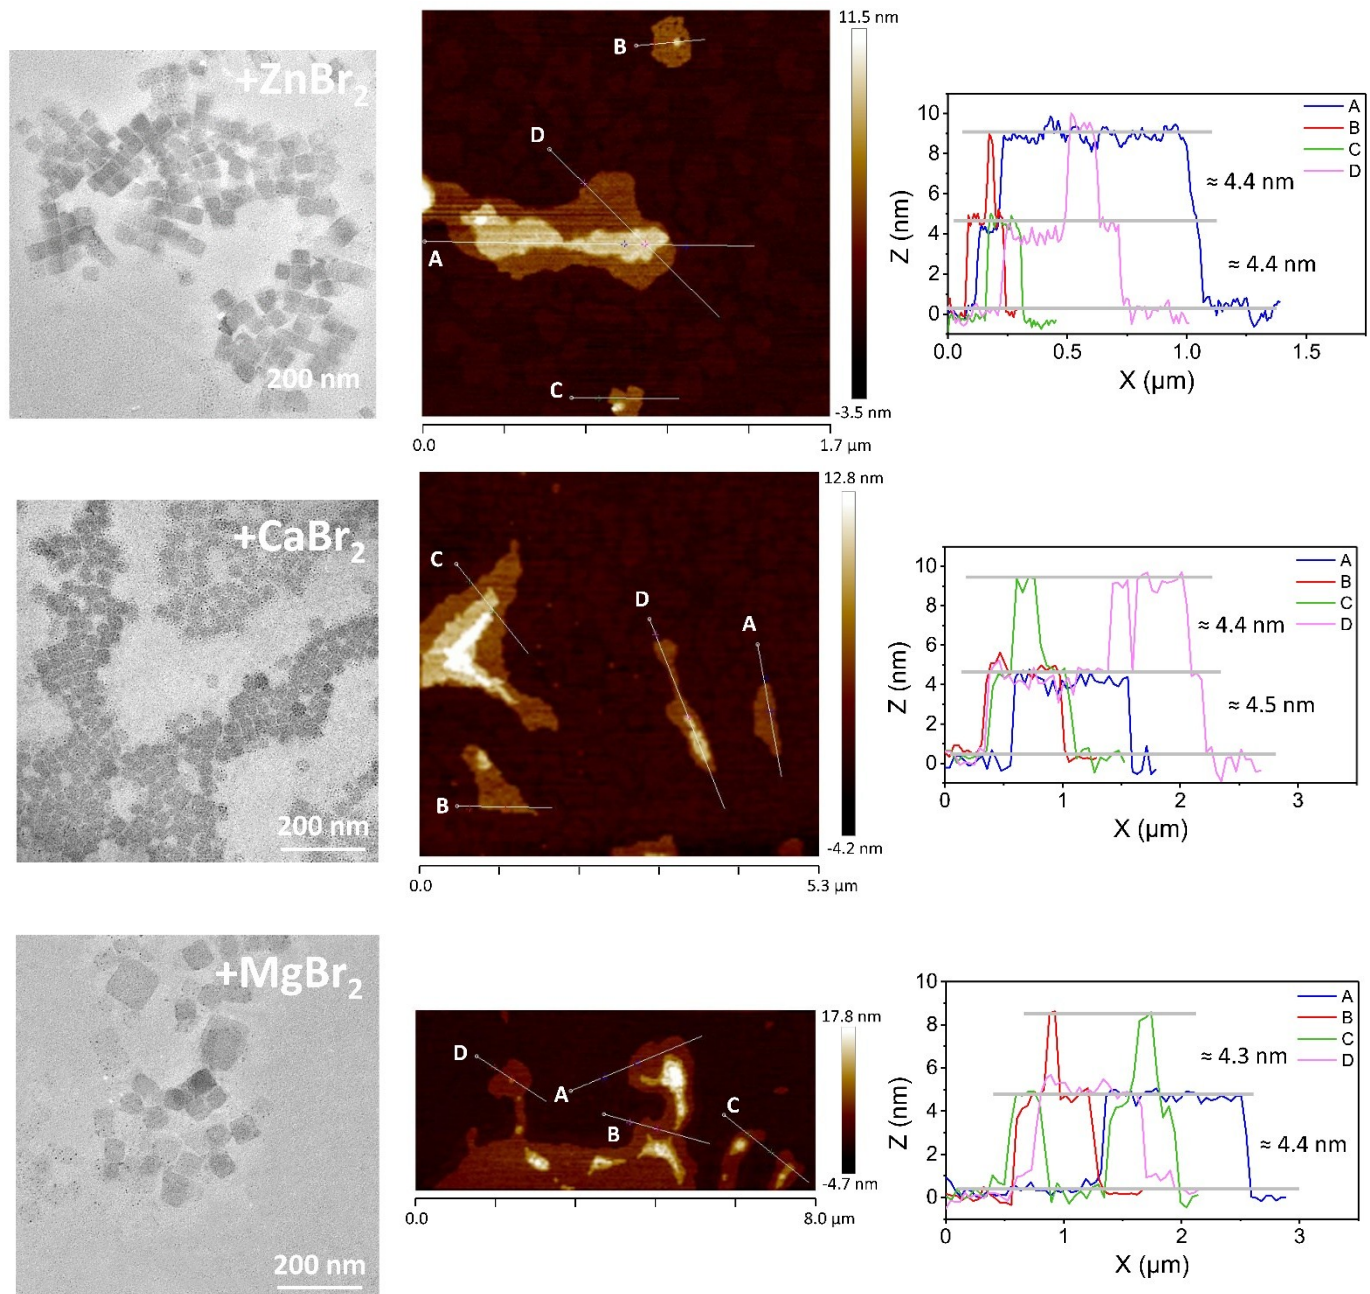

Figure S9. TEM images of NPLs lying flat on the TEM copper substrate, AFM topography image and line profiles of (layers of) CsPbBr<sub>3</sub> NPLs synthesized with ZnBr<sub>2</sub>, CaBr<sub>2</sub>, MgBr<sub>2</sub> respectively.

Table S2. Amounts of chemicals for synthesizing CsPbBr<sub>3</sub> with additional metal bromides or OLA-HBr

| Sample                                         | PbBr <sub>2</sub> (367.01) |        | additional                         |         | CsOA  | OA    | OLA   | ODE |
|------------------------------------------------|----------------------------|--------|------------------------------------|---------|-------|-------|-------|-----|
|                                                |                            |        | reagent(MBr <sub>x</sub> /OLA-HBr) |         |       |       |       |     |
| <b>CsPbBr<sub>3</sub></b>                      | 0.188mmol                  | 0.069g | 0mmol                              | 0 g     | 0.4mL | 0.5mL | 0.5mL | 5mL |
| <b>FeBr<sub>3</sub>:PbBr<sub>2</sub>=0.2:1</b> | 0.188mmol                  | 0.069g | 0.0376mmol                         | 0.0111g | 0.4mL | 0.6mL | 0.6mL | 5mL |
| <b>FeBr<sub>3</sub>:PbBr<sub>2</sub>=0.4:1</b> | 0.188mmol                  | 0.069g | 0.0752mmol                         | 0.0222g | 0.4mL | 0.7mL | 0.7mL | 5mL |
| <b>FeBr<sub>3</sub>:PbBr<sub>2</sub>=0.6:1</b> | 0.188mmol                  | 0.069g | 0.1128mmol                         | 0.0333g | 0.4mL | 0.8mL | 0.8mL | 5mL |
| <b>FeBr<sub>3</sub>:PbBr<sub>2</sub>=0.8:1</b> | 0.188mmol                  | 0.069g | 0.1504mmol                         | 0.0445g | 0.4mL | 0.9mL | 0.9mL | 5mL |
| <b>FeBr<sub>3</sub>:PbBr<sub>2</sub>=1:1</b>   | 0.188mmol                  | 0.069g | 0.1880mmol                         | 0.0556g | 0.4mL | 1.0mL | 1.0mL | 5mL |
| <b>FeBr<sub>3</sub>:PbBr<sub>2</sub>=1.2:1</b> | 0.188mmol                  | 0.069g | 0.2256mmol                         | 0.0667g | 0.4mL | 1.1mL | 1.1mL | 5mL |
| <b>FeBr<sub>3</sub>:PbBr<sub>2</sub>=1.4:1</b> | 0.188mmol                  | 0.069g | 0.2632mmol                         | 0.0779g | 0.4mL | 1.2mL | 1.2mL | 5mL |
| <b>FeBr<sub>3</sub>:PbBr<sub>2</sub>=1.6:1</b> | 0.188mmol                  | 0.069g | 0.3008mmol                         | 0.0889g | 0.4mL | 1.3mL | 1.3mL | 5mL |
| <b>FeBr<sub>3</sub>:PbBr<sub>2</sub>=1.8:1</b> | 0.188mmol                  | 0.069g | 0.3384mmol                         | 0.1000g | 0.4mL | 1.4mL | 1.4mL | 5mL |
| <b>ZnBr<sub>2</sub>:PbBr<sub>2</sub>=2.7:1</b> | 0.188mmol                  | 0.069g | 0.5076mmol                         | 0.1143g | 0.4mL | 1.4mL | 1.4mL | 5mL |
| <b>MgBr<sub>2</sub>:PbBr<sub>2</sub>=2.7:1</b> | 0.188mmol                  | 0.069g | 0.5076mmol                         | 0.0934g | 0.4mL | 1.4mL | 1.4mL | 5mL |
| <b>CaBr<sub>2</sub>:PbBr<sub>2</sub>=2.7:1</b> | 0.188mmol                  | 0.069g | 0.5076mmol                         | 0.1014g | 0.4mL | 1.4mL | 1.4mL | 5mL |
| <b>OLA-HBr-1</b>                               | 0.188mmol                  | 0.069g |                                    | 0.2mL   | 0.4mL | 0.5mL | 0.5mL | 5mL |
| <b>OLA-HBr-2</b>                               | 0.188mmol                  | 0.069g |                                    | 0.4mL   | 0.4mL | 0.5mL | 0.5mL | 5mL |
| <b>OLA-HBr-3</b>                               | 0.188mmol                  | 0.069g |                                    | 0.6mL   | 0.4mL | 0.5mL | 0.5mL | 5mL |
